# Supplementary material for: Revealing the importance of prenatal gut microbiome in offspring neurodevelopment in humans
Source: PubMed Central journal article supplement — eBioMedicine. 2023 Mar 1;90:104491. doi: 10.1016/j.ebiom.2023.104491 (PMC9996363; doi:10.1016/j.ebiom.2023.104491), 2023-03-01
Supplement: mmc7.pdf [file mmc7.pdf]

Mother

Infant

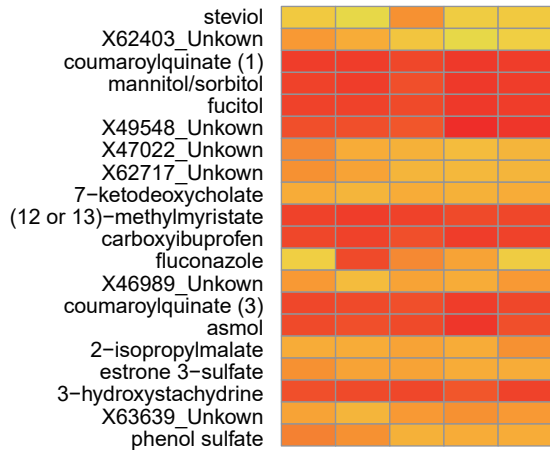

Top 20 compounds

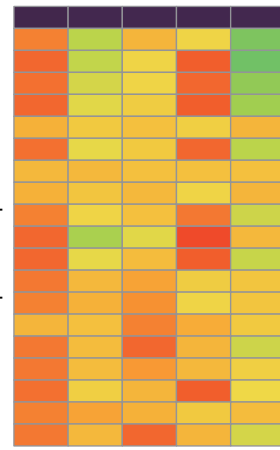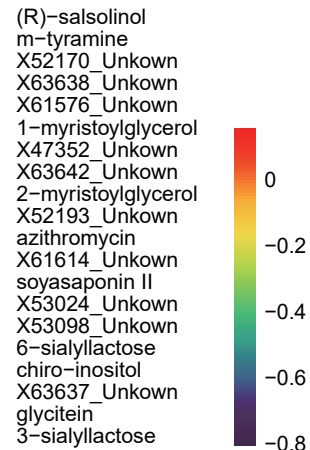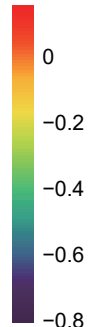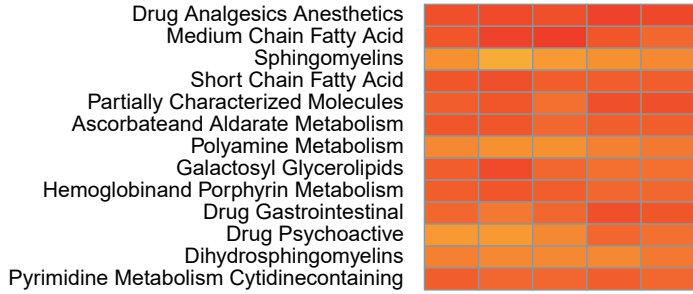

Top 20 pathways

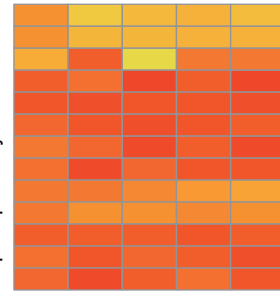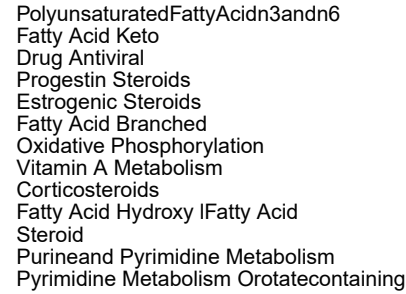

Inositol Metabolism  
Tetrahydrobiopterin Metabolism  
Drug Neurological  
Drug Antibiotic  
Acetylated Peptides  
Chemical  
Fructose Mannoseand Galactose Metabolism

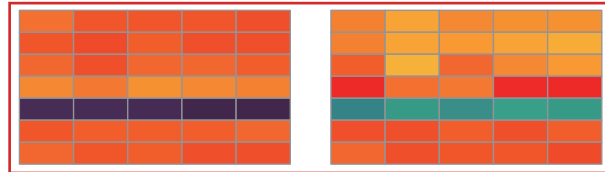

Inositol Metabolism  
Tetrahydrobiopterin Metabolism  
Drug Neurological  
Drug Antibiotic  
Acetylated Peptides  
Chemical  
Fructose Mannoseand Galactose Metabolism

ASQ Y1 COM  
ASQ Y1 FM  
ASQ Y1 GM  
ASQ Y1 PerS  
ASQ Y1 ProS  
ASQ Y2 COM  
ASQ Y2 FM  
ASQ Y2 GM  
ASQ Y2 PerS  
ASQ Y2 ProS
