# Supplementary figures and images for: Revealing the importance of prenatal gut microbiome in offspring neurodevelopment in humans
Source: PubMed Central journal article supplement — eBioMedicine. 2023 Mar 1;90:104491. doi: 10.1016/j.ebiom.2023.104491 (PMC9996363; doi:10.1016/j.ebiom.2023.104491), 2023-03-01

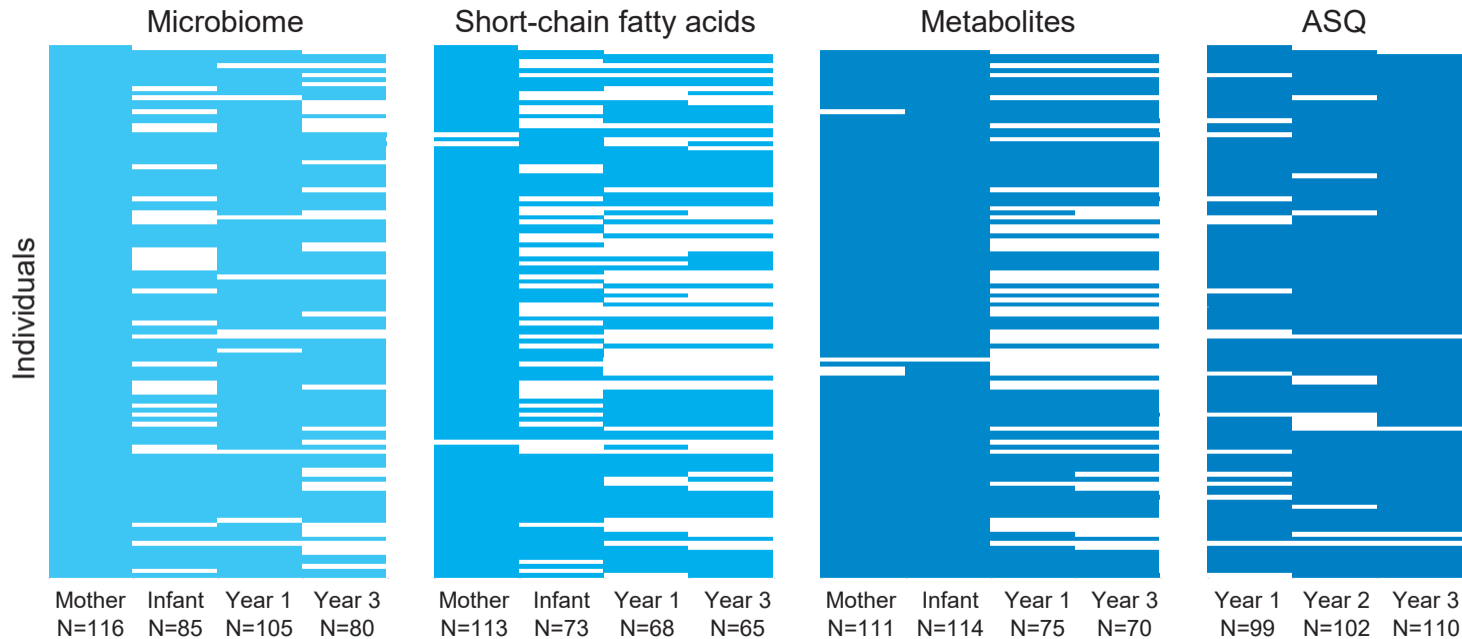

Supplement: mmc2.pdf [file mmc2.pdf]

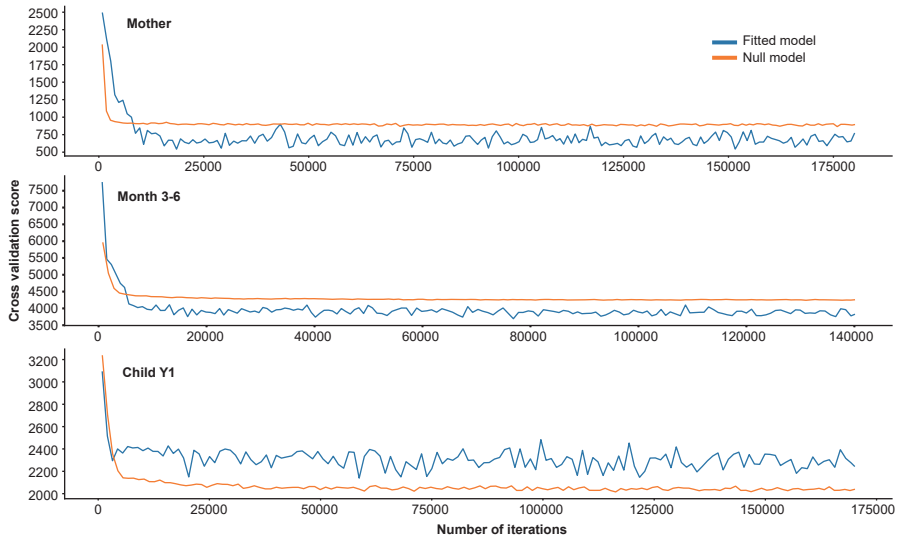

Supplement: mmc3.pdf [file mmc3.pdf]

Microbiota

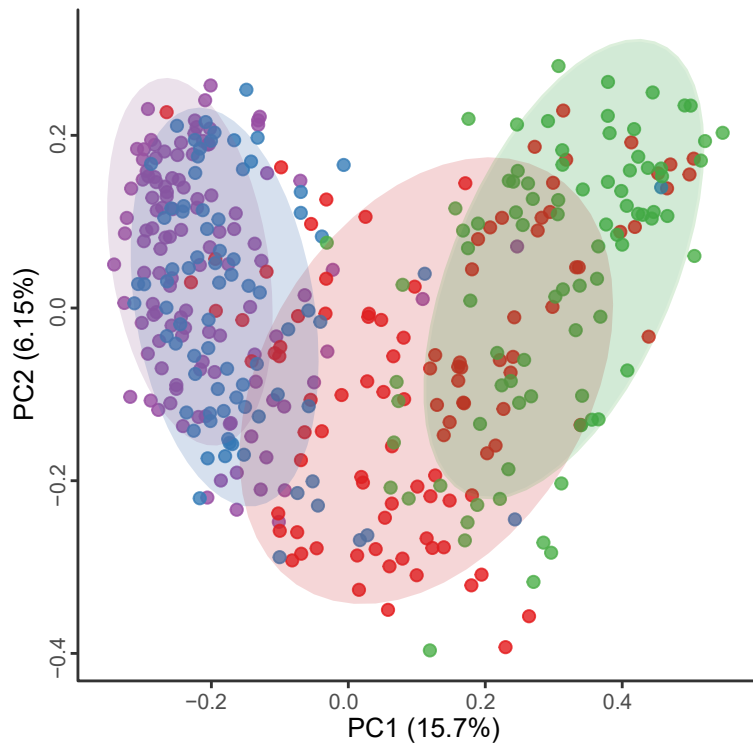

SCFA

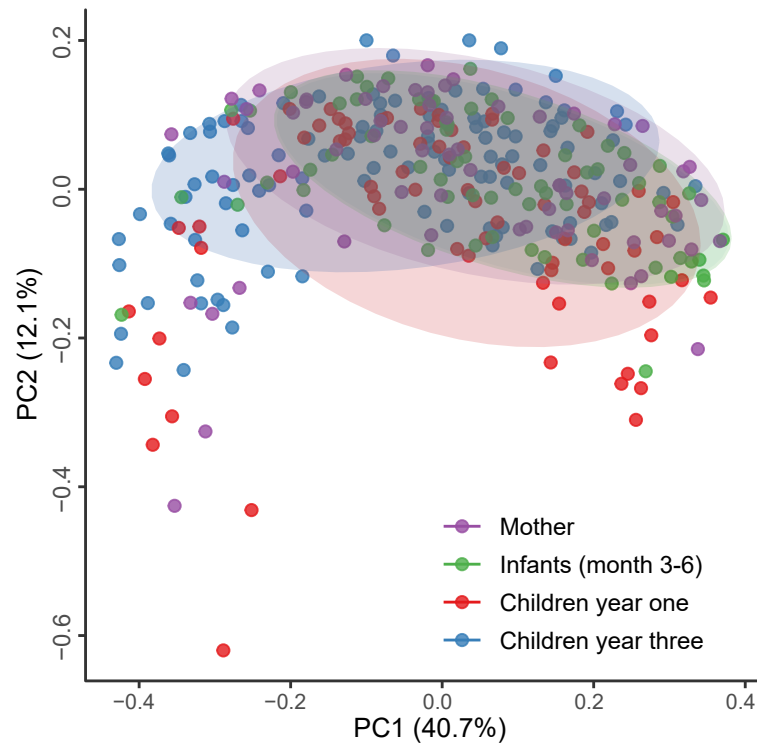

Metabolites

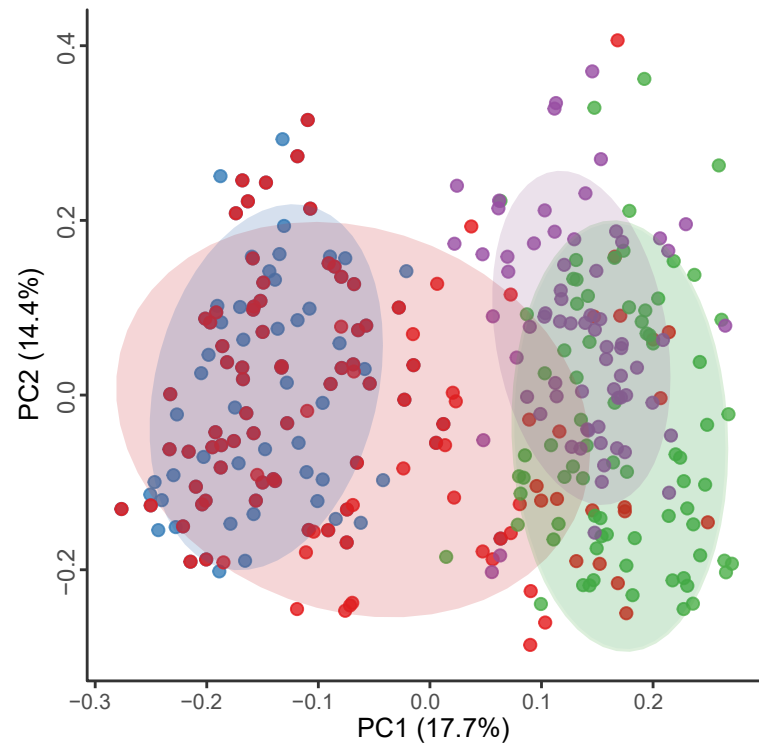

Supplement: mmc4.pdf [file mmc4.pdf]

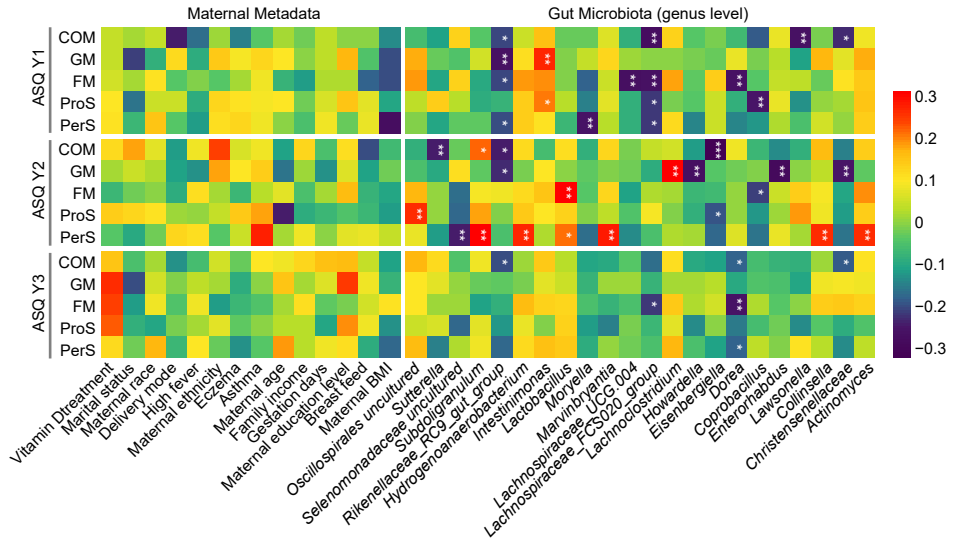

Supplement: mmc5.pdf [file mmc5.pdf]

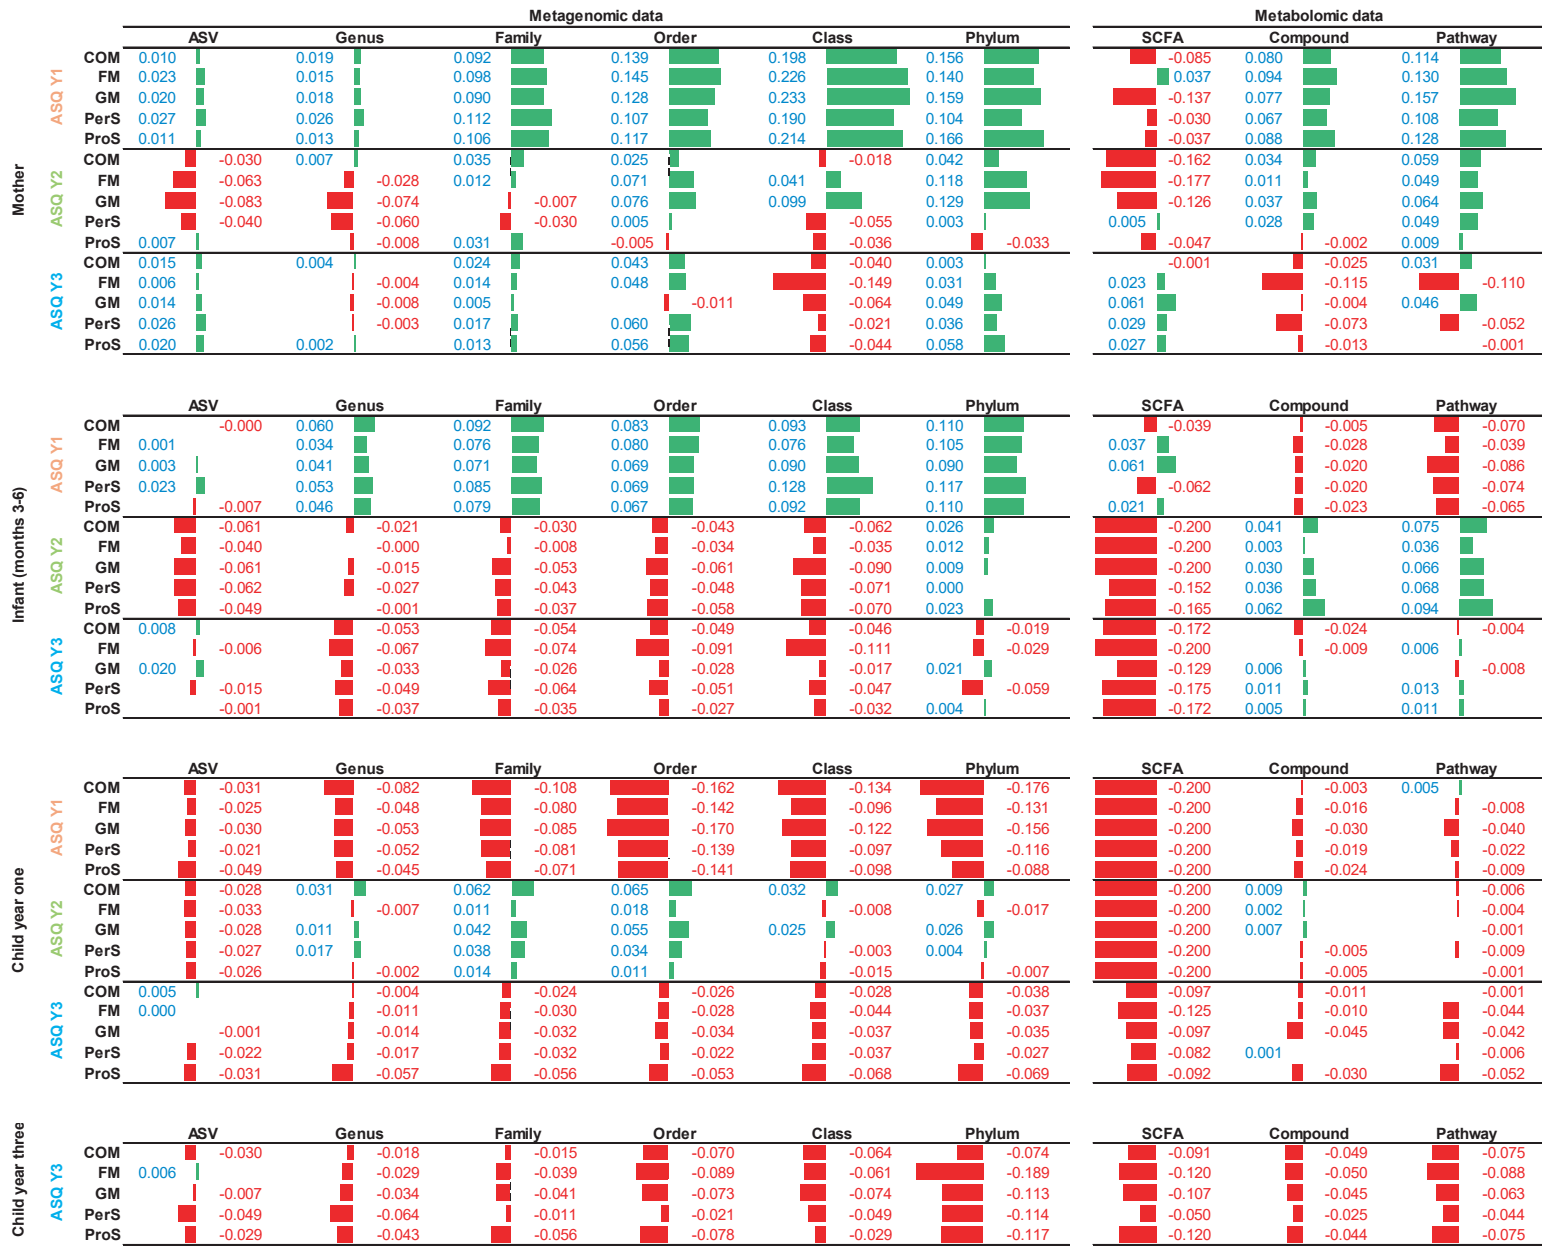

Supplement: mmc6.pdf [file mmc6.pdf]
